RESEARCH ARTICLE

# A semi-automated algorithm for image analysis of respiratory organoids

Anna Demchenko<sup>1\*</sup>, Maxim Balyasin<sup>1,2</sup>, Elena Kondratyeva<sup>1</sup>, Tatiana Kyian<sup>1</sup>, Alyona Sorokina<sup>3</sup>, Marina Loguinova<sup>3</sup>, Svetlana Smirnikhina<sup>1</sup>

**1** Research Centre for Medical Genetics, Moscow, Russian Federation, **2** Peoples' Friendship University of Russia, Moscow, Russian Federation, **3** Endocrinology Research Center, Moscow, Russian Federation

\* [demchenkoann@yandex.ru](mailto:demchenkoann@yandex.ru)

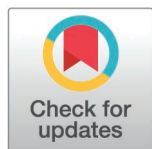

## Abstract

Respiratory organoids have emerged as a powerful *in vitro* model for studying respiratory diseases and drug discovery. However, the high-throughput analysis of organoid images remains a challenge due to the lack of automated and accurate segmentation tools. This study presents a semi-automatic algorithm for image analysis of respiratory organoids (nasal and lung organoids), employing the U-Net architecture and CellProfiler for organoids segmentation. The algorithm processes bright-field images acquired through z-stack fusion and stitching. The model demonstrated a high level of accuracy, as evidenced by an intersection-over-union metric (IoU) of 0.8856, F1-score = 0.937 and an accuracy of 0.9953. Applied to forskolin-induced swelling assays of lung organoids, the algorithm successfully quantified functional differences in Cystic Fibrosis Transmembrane conductance Regulator (CFTR)-channel activity between healthy donor and cystic fibrosis patient-derived organoids, without fluorescent dyes. Additionally, an open-source dataset of 827 annotated respiratory organoid images was provided to facilitate further research. Our results demonstrate the potential of deep learning to enhance the efficiency and accuracy of high-throughput respiratory organoid analysis for future therapeutic screening applications.

## OPEN ACCESS

**Citation:** Demchenko A, Balyasin M, Kondratyeva E, Kyian T, Sorokina A, Loguinova M, et al. (2025) A semi-automated algorithm for image analysis of respiratory organoids. *PLoS Comput Biol* 21(10): e1013589. <https://doi.org/10.1371/journal.pcbi.1013589>

**Editor:** Virginie Uhlmann, University of Zurich Faculty of Mathematics and Science: Universitat Zurich Mathematisch-Naturwissenschaftliche Fakultät, SWITZERLAND

**Received:** June 11, 2025

**Accepted:** October 3, 2025

**Published:** October 27, 2025

**Copyright:** © 2025 Demchenko et al. This is an open access article distributed under the terms of the [Creative Commons Attribution License](https://creativecommons.org/licenses/by/4.0/), which permits unrestricted use, distribution, and reproduction in any medium, provided the original author and source are credited.

**Data availability statement:** All relevant data are within the manuscript and its [Supporting information](#) files.

**Funding:** This research was supported by the Ministry of Science and Higher Education of

## Author summary

In this study, we developed a semi-automated tool to analyze images of respiratory organoids—3D cell structures that mimic the human respiratory system. These organoids are vital for studying diseases like cystic fibrosis and testing potential drugs, but manually analyzing their images is time-consuming and prone to errors. Our tool uses artificial intelligence (AI) to quickly and accurately measure organoid size and shape from bright-field microscope images, eliminating the need for fluorescent dyes that can harm cells. We trained our AI model on a publicly shared dataset of 827 annotated organoid images, achieving high

the Russian Federation for RCMG. The funders had no role in study design, data collection and analysis, decision to publish, or preparation of the manuscript.

**Competing interests:** The authors have declared that no competing interests exist.

accuracy in detecting and quantifying organoids. When applied to cystic fibrosis research, the tool successfully measured differences in organoid swelling (forskolin-induced swelling - a key test for drug response) between healthy and patient-derived samples. By making our dataset and method openly available, we hope to support further research into respiratory diseases. Our work bridges the gap between complex lab techniques and practical applications, offering a faster, more reliable way to study human health and disease.

## Introduction

Organoids are three-dimensional cell cultures that recapitulate the structure and function of organs, making them established models for *in vitro* studies of drug discovery and disease mechanisms [1–3]. Organoids of the respiratory tract, such as nasal and lung organoids (NOs and LOs, respectively), have emerged as particularly useful models for studying various respiratory conditions including chronic obstructive pulmonary disease, cystic fibrosis (CF), viral infections, idiopathic pulmonary fibrosis (IPF), and other pulmonary diseases [4–7]. Respiratory organoids can be derived either from biopsy material [7–9], or by directed differentiation from human induced pluripotent stem cells (hiPSCs) [10,11]. Obtaining organoids from hiPSCs offers several advantages, including scalability (iPSCs provide an unlimited cell source), less invasive procedures using accessible somatic cells (e.g., skin or blood), and a more standardized and reproducible cell platform [12,13].

CF is one of the most common monogenic hereditary diseases which occurs due to mutations in the *CFTR* gene. The number of patients in the world exceeds 100 thousand people (about 4 thousand live in Russia [14], more than 33 thousand are registered in the USA [15], more than 56 thousand - in Europe [16]), of whom from 52% to 85.5% have at least one copy of F508del variant (<https://www.cff.org/medical-professionals/patient-registry>). The *CFTR* gene encodes a chloride ion channel on the apical surface of epithelial cells. The homozygous F508del variant disrupts protein folding and transport to the membrane, impairing chloride and sodium ion transport [17]. In CF it is relevant to assess the functional activity of CFTR-channel using the forskolin-induced swelling (FIS) test, the effect of which is based on activation of CFTR-channel, which results in the influx of fluid into the lumen of the organoid and swelling of the organoid is observed. Currently, FIS on intestinal organoids has found widespread use in the selection of targeted therapy for patients with CF (drug-induced swelling, DIS) [18], however, respiratory tract organoids such as NOs and LOs are also beginning to be used as they are a more relevant disease model [19]. Organoid functional analysis generates hundreds or thousands of organoid images that need to be analyzed to assess the efficacy of therapy. Morphometric image analysis software such as ImageJ and CellProfiler are commonly used to analyze images from FIS or DIS assays. However, these approaches require manual parameter selection and settings adjustment [20,21], which makes them labour-intensive and potentially subject to user bias.

For accurate, automated and high-throughput analysis, it is necessary to automate the process of organoid image analysis. Recent advances in AI, particularly deep learning models such as convolutional neural networks (CNNs), offer promising solutions for automated organoid image analysis [22]. For instance, a recent comprehensive benchmark study by Cicceri et al. demonstrated the superior effectiveness of Deep Learning models, including vision transformers, over traditional machine learning methods in capturing subtle morphological differences for the classification of intestinal organoids, reinforcing the critical need for automated and scalable analysis frameworks in organoid research [23]. [Table 1](#) provides an overview of the main organoid imaging programs currently available. These programs typically work with images captured in phase contrast or bright-field (BF), eliminating the need for dyes to visualize organoids. This approach reduces manipulation steps, avoids the cytotoxic effects of dyes and UV exposure on organoids, and decreases the time required for FIS analysis. For segmentation and object detection tasks, there are several popular model architectures such as R-CNN, Mask R-CNN, YOLOX and their variations. A model architecture specialized for image segmentation tasks is U-Net, which shows higher accuracy and is often used in morphometric algorithms and software such as StarDist, Cellpose and DeepMIB [24–27]. As shown in [Table 1](#), three programs (Organoid, OrganoLabeler, OrgaExtractor) are based on the U-Net algorithm, while the remaining programs utilize other CNN architectures. U-Net is based on semantic segmentation, dividing the image into semantic classes (e.g., background, live cells, dead cells) without separating individual objects within a class. This approach is simpler compared to instance segmentation methods like Mask R-CNN, which often show lower accuracy in semantic segmentation tasks [28,29]. The potential of organoid-based models extends beyond mere image analysis into the emerging field of ‘organoid intelligence’, which aims to harness the computational potential of brain organoids combined with AI [30]. This interdisciplinary approach, leveraging microfluidics, electrophysiology, and deep learning, holds transformative potential for biocomputing and disease modeling, as highlighted in recent perspectives. However, this also introduces complex ethical and regulatory considerations that must be addressed alongside technical development. For LOs specifically, the Deep-LUMEN program can classify the polarity of spheroids from BF images, but it is limited to spheroids obtained from adenocarcinomic human alveolar basal epithelial cells (A549 cells line) [31]. Bian et al. described an algorithm trained on images of mouse liver organoids and alveolar organoids [32]. However, the program uses a method of determining object coordinates using a bounding box, which does not allow accurate object segmentation. Two automatic programs trained on intestinal organoids and used to analyze organoid morphology after forskolin exposure are described [33,34], but both programs also define the bounding box of organoids and do not allow to define the exact boundaries of all organoids in the image.

In this work, we describe a new semi-automatic algorithm for analyzing NOs and hiPSCs-derived lung organoids (hiLOs) and its application in the analysis of FIS. While several organoid image analysis tools exist ([Table 1](#)), a significant gap remains for solutions specifically tailored to respiratory organoids derived from both primary tissues and hiPSCs. Most available programs are trained on intestinal organoids [33–38], rely on bounding boxes that preclude precise morphological analysis [32,33], or are not designed for high-throughput z-stack imaging of entire wells—a critical requirement for drug screening pipelines. In our algorithm, we propose to acquire images of the whole drop with organoids and capture images along the z-axis, followed by horizontal and vertical stitching and focus stacking. We selected the U-Net architecture for image segmentation and employed CellProfiler to separate organoids into individual objects. Additionally, we provide an open-source dataset that includes stitched BF images with manually labeled binary masks after focus stacking, addressing the current lack of publicly available datasets for respiratory organoids.

## Results

### Algorithm for image analysis

A comprehensive semi-automated algorithm was developed for analyzing morphological characteristics of respiratory organoids ([Fig 1](#)). The system integrates multiple computational platforms, beginning with a Jupyter Notebook containing code that prepares source images for model application, performs image processing, and saves both stitched images

**Table 1. Overview of the main programs for organoid image analysis.**

| Program                                                                                | Algorithm                                                               | Annotation and tracking of organoids | Input images                                                      | Objects                                                      | Accuracy of algorithm                                                                      | Program availability                                                                          | Dataset                                                            | References |
|----------------------------------------------------------------------------------------|-------------------------------------------------------------------------|--------------------------------------|-------------------------------------------------------------------|--------------------------------------------------------------|--------------------------------------------------------------------------------------------|-----------------------------------------------------------------------------------------------|--------------------------------------------------------------------|------------|
| OrganoID                                                                               | U-Net                                                                   | Both                                 | BF and phase-contrast images                                      | Mouse small intestinal organoids                             | Tracking maintained over 89% accuracy. Organoid counts agreed with a CCC of 0.95. IoU=0.74 | Open-source                                                                                   | 66 images                                                          | [35]       |
| OrgaQuant                                                                              | R-CNN and Faster R-CNN                                                  | Both                                 | BF images                                                         | Human intestinal organoids                                   | mAP of 80%                                                                                 | Open-source                                                                                   | 1750 images                                                        | [36]       |
| OrganoSeg                                                                              | MATLAB using the Image Processing Toolbox                               | Annotation                           | BF, phase-contrast, and differential-interference contrast images | Breast-cancer spheroid, colon and colorectal cancer organoid | Sensitivity 92% Positive predictive value 96%                                              | Open-source                                                                                   | N/A                                                                | [37]       |
| OrgaSegment                                                                            | MASK-R-CNN                                                              | Both                                 | BF images                                                         | Intestinal organoids                                         | N/A                                                                                        | Open-source                                                                                   | 231 images                                                         | [38]       |
| OrganoIDNet                                                                            | DL algorithm (trained a StarDist model n using custom dataset)          | Both                                 | BF images                                                         | Human pancreatic ductal adenocarcinoma organoids             | nFP did not exceed 18.5%, and nFN counts were no more than 16.4%                           | Open-source                                                                                   | 180 images                                                         | [39,40]    |
| OrganoLabeler                                                                          | U-Net                                                                   | Annotation                           | BF images                                                         | Embryoid body (EB) and brain organoid (BO)                   | IoU: EB – 0.71 BO – 0.91                                                                   | Open-source                                                                                   | 165 images of EB, 133 images of BO                                 | [41]       |
| OrgaExtractor                                                                          | U-Net                                                                   | Annotation                           | BF images                                                         | Colon organoids                                              | Sensitivity 83.8% Specificity 76.9% Accuracy 81.3%                                         | Open-source                                                                                   | 248 images                                                         | [42]       |
| Deep-LUMEN                                                                             | Faster R-CNN ResNet101 with data augmentation                           | Both                                 | BF images                                                         | Lung spheroid (A549 cells line)                              | mAP 83%                                                                                    | Open-source                                                                                   | 4000 images                                                        | [31]       |
| Deep-Orga                                                                              | Lightweight model YOLOX                                                 | Annotation                           | BF images                                                         | Intestinal organoid                                          | mAP 72.2%                                                                                  | Open-source                                                                                   | 1750 images                                                        | [43]       |
| D-CryptO                                                                               | Xception                                                                | Both                                 | BF images                                                         | Colon organoid                                               | Accuracy: for opacity – 98%, for budding – 90.87%                                          | N/A                                                                                           | The initial dataset comprised 35 images, which were later expanded | [33]       |
| OrBITS                                                                                 | CNN                                                                     | Both                                 | BF images                                                         | Lung and pancreatic cancer organoids                         | N/A                                                                                        | Available to researchers upon reasonable request and discussion with the corresponding author | N/A                                                                | [44]       |
| A deep learning model for detection and tracking in high-throughput images of organoid | Several DL-based: Faster_R-CNN, R-CNN, Free_anchor, Fovea-Box and other | Both                                 | Phase-contrast images                                             | Mice liver organoids and alveolar organoids                  | mAP 80.9%                                                                                  | Open-source                                                                                   | 75 images                                                          | [32]       |

Abbreviations: BF - bright-field, CCC - concordance correlation coefficient, IoU - intersection-over-union metric, CNN - Convolutional Neural Network, R-CNN - Region Convolutional Neural Network, mAP - mean Average Precision, DL - deep learning, N/A - not available, nFP - normalized false positive, nFN - normalized false negative.

<https://doi.org/10.1371/journal.pcbi.1013589.t001>

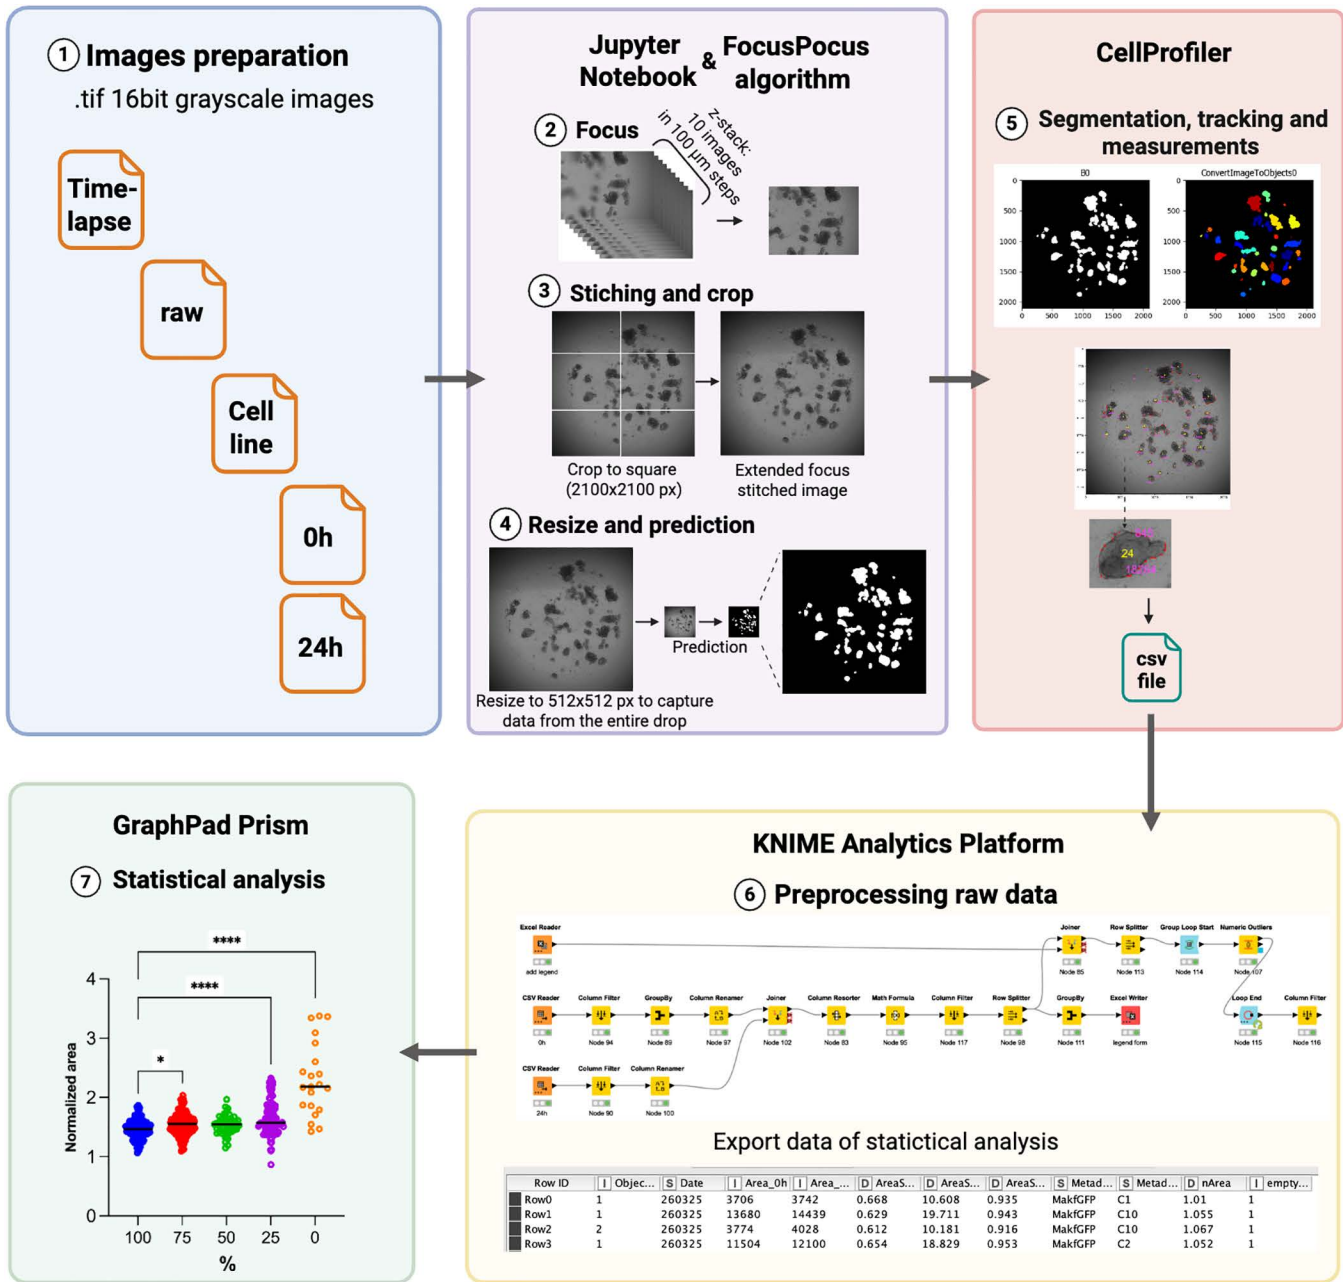

**Fig 1. Schematic representation of semi-automated algorithm for organoids analyzing.** The pipeline begins with the acquisition of raw bright-field z-stack images from multiple fields of view (1). Then images are processed to generate a single, sharp EFSI for each well, cropped (2-3) and pre-processed for optimal segmentation by a trained U-Net convolutional neural network, which produces a primary binary mask (4). This mask is subsequently refined by a CellProfiler pipeline that separates clustered organoids, filters out artifacts based on size and shape, and performs instance segmentation to identify individual organoids, then extracts quantitative morphological parameters for each object (5) including unique ID assignment for temporal tracking. For time-course experiments, CellProfiler tracks organoids across time points using position-based matching applied in reverse chronological order to mitigate occlusion errors. Finally, the extracted data is integrated and analyzed in a KNIME workflow to calculate key metrics (6) and generate consolidated tables for statistical analysis (7). This figure was created using the Biorender application.

<https://doi.org/10.1371/journal.pcbi.1013589.g001>

and corresponding masks. The algorithm's workflow processes raw microscopic images captured using a 4 × objective lens across various focal planes (10 focus levels with 100 μm increments) from multiple fields of view (FOV) for each well. The initial processing phase implements z-stack fusion to generate sharp, in-focus organoid images, followed by x-y axis stitching to create extended focus stitched image (EFSI). These images undergo additional preprocessing including cropping, resizing, and prediction operations to optimize them for subsequent analysis.

Following image preparation, the U-Net model performs semantic segmentation to generate primary binary masks distinguishing organoid pixels from background. These masks are subsequently processed through a customized CellProfiler pipeline that executes instance segmentation to separate touching organoids into individual objects using watershed algorithms, applies morphological filtering to remove artifacts based on size and circularity criteria, and enables temporal tracking by assigning unique identifiers to each organoid and matching them across time points via position-based algorithms. This stage incorporates primary filtration protocols to eliminate artifacts and objects that don't meet size criteria (e.g., extremely small particles or atypical structures).

CellProfiler then extracts per-organoid 2D morphometrics from the binary masks, including area, perimeter, centroid, axes and orientation, eccentricity, form factor ( $4\pi A/P^2$ ), solidity, extent, compactness, Euler number, radii and Feret diameters. These measurements are computed by CellProfiler's MeasureObjectSizeShape module on the binary masks. A distinctive feature of our approach is the organoid tracking methodology, which is position-based and proceeds in reverse chronological order—starting from later time points and working backward. This reverse tracking strategy is implemented because organoids typically increase in size over time and larger, later-stage organoids would otherwise obscure their smaller initial states in the tracking process.

The resultant analysis tables are exported to a KNIME workbook for advanced data integration, including compilation of organoid data across different time points (e.g., “0 h” and “24 h”), calculation of size increments, and generation of visualization elements necessary for subsequent statistical analysis. These processed datasets are formatted for compatibility with statistical analysis software such as GraphPad Prism or equivalent platforms. This algorithmic approach ensures automated and reproducible processing of organoid images and generates consolidated analytical tables suitable for comprehensive biostatistical analysis.

## Model evaluation

The U-Net model was trained on 703 images (85% of the total dataset), with concurrent validation performed on 83 images (10%), followed by final performance assessment on a test set of 41 images (5% of the dataset). Initially, manual segmentation masks were generated by two independent annotators. Inter-annotator agreement (per-image F1 and IoU) was  $F1 = 0.9086 \pm 0.1048$ ;  $IoU = 0.8461 \pm 0.1456$ . The evaluation ground truth was defined as the intersection (AND operation) of the two annotations to form a consensus mask. Consequently, the model demonstrated high efficiency in organoid segmentation (Fig 2A) across the test set images which includes all types of organoids presented in Table 2. The raw model outputs achieved mean metric values of IoU (calculated at the pixel level for the organoid class) = 0.7007, Accuracy = 0.9967, and  $F1 = 0.7613$ . Post-processing of the model's binary mask outputs using CellProfiler software (Broad Institute of MIT and Harvard, USA) [45] allowed for slight improvements in performance metrics:  $IoU = 0.7068$ , Accuracy = 0.9968, and  $F1 \text{ score} = 0.7574$ . Notably, the validation dataset included 14 images containing  $\leq 5000$  labeled px (0.1% of the image) without organoids, consisting only of background, bubbles, or dead organoids. When evaluating the subset of 27 images containing viable organoids, the raw model outputs achieved substantially higher metrics:  $IoU = 0.879$ , Accuracy = 0.9952, and  $F1 = 0.9334$ . For the CellProfiler-processed masks, the values were:  $IoU = 0.8856$ , Accuracy = 0.9953, and  $F1 = 0.9373$  (Fig 2B). The comprehensive model performance parameters are presented in Table A in S1 Text. Correlation analysis for individual organoids between the U-Net model-predicted masks (post-processed with CellProfiler) and the original ground truth annotations revealed a strong correlation coefficient of  $R^2 = 0.9872$  ( $p < 0.0001$ , Fig 2C). Since processing the masks obtained by U-Net model using

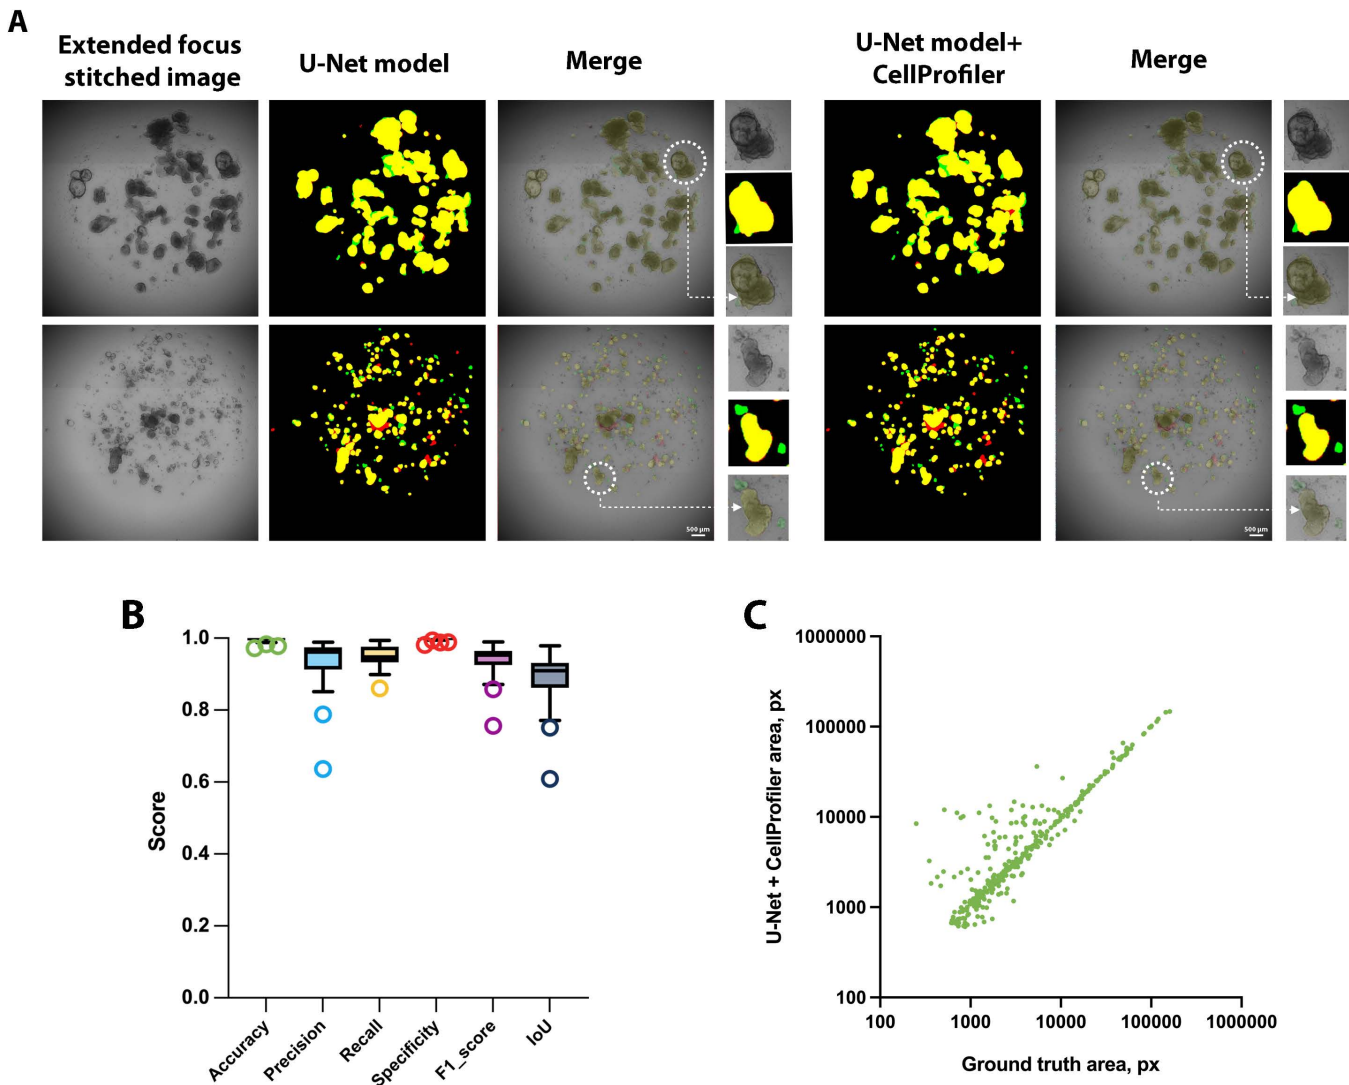

**Fig 2. Performance of the model on the validation dataset of EFSI.** (A) Binary masks predicted by the U-Net model and with CellProfiler post-processing (U-Net model+ CellProfiler), with color-coding: yellow - true positives, green - false negatives, red - false positives. (B) Performance metrics of U-Net model output with CellProfiler post-processing on validation set excluding images with minimal annotations (<5000 px) containing primarily background. (C) Correlation plot of individual object sizes from manual annotations (ground truth annotations) versus model (U-Net model+ CellProfiler) predictions in the validation dataset excluding images with minimal annotations (<5000 px), ( $R^2=0.9872$ ,  $p<0.0001$ ).

<https://doi.org/10.1371/journal.pcbi.1013589.g002>

CellProfiler slightly increases the resulting power, we use this approach to subsequent analyze the organoid images. Moreover, the performance of our model was benchmarked against two established methods: the classical object segmentation pipeline, CellProfiler, and the widely used ilastik pixel classifier (European Molecular Biology Laboratory), an accessible machine learning-based solution for object segmentation [46]. The CellProfiler pipeline for generating organoids binary masks has been made available in the dataset repository [https://osf.io/4savy/?view\\_only=2163a86b20a5468989c041536752b19e](https://osf.io/4savy/?view_only=2163a86b20a5468989c041536752b19e). The ilastik software was trained in a manner analogous to the U-Net model, utilizing the same set of images. Similarly, the parameters for the minimum cross-entropy thresholding method in CellProfiler were manually optimized using the same training dataset. On a test set of 41 images, CellProfiler achieved IoU=0.4039,

**Table 2. List of organoids lines used in the research.**

| Donor | Origin         | Organoid line | CFTR genotype   | References on hiPSC line |
|-------|----------------|---------------|-----------------|--------------------------|
| 1     | hiPSCs-derived | hiLOs P1L5    | F508del/F508del | [58]                     |
| 2     |                | hiLOs P5L5    | F508del/F508del | [59]                     |
| 3     |                | hiLOs P7L2    | F508del/F508del | [60]                     |
| 4     |                | hiLOs Mak-f   | WT/WT           | [61]                     |
| 5     | Primary        | hNOs 35       | WT/WT           | –                        |
| 6     |                | hNOs 43       | WT/WT           | –                        |

<https://doi.org/10.1371/journal.pcbi.1013589.t002>

Accuracy = 0.975, and F1-score = 0.4989, while ilastik showed IoU = 0.3984, Accuracy = 0.9806, and F1-score = 0.4988 (Fig B in S1 Text). Additionally, for a subset of 27 images containing viable organoids, CellProfiler achieved IoU = 0.5818, Accuracy = 0.9775, and F1-score = 0.7071, while ilastik showed IoU = 0.5665, Accuracy = 0.9774, and F1-score = 0.6951. Therefore, our model provides more accurate and spatially coherent segmentations than CellProfiler and ilastik, as reflected by consistently higher IoU and F1 scores.

### Application of the model to the detection of respiratory organoids

The U-Net model with CellProfiler post-processing was applied to the detection of new data of respiratory organoids and compared respiratory organoid sizes. Primary hNOs derived from two donors (hNOs 35 and hNOs 43) and hiLOs derived from two donors (hiLOs P1L5 and hiLOs Mak-f) were used for this research. As can be seen in Fig 3A, respiratory organoids can vary in size and morphology. Bubbles may be present within the droplets containing the organoids, and the illumination may be irregular during image acquisition. The developed semi-automated algorithm successfully copes with these issues, as it does not encircle the bubbles and can detect organoids of different sizes.

Analysis of respiratory organoid area using the U-Net model with CellProfiler post-processing revealed significant differences in organoid size (Fig 3B). Median hNOs area values were 1369 px or 5476  $\mu\text{m}^2$  (Q1,Q3: 736–3150 px, n = 1703 organoids) for hNOs 35 and 792 px 3168  $\mu\text{m}^2$  (Q1,Q3: 483–1261 px, n = 3418 organoids) for hNOs 43. For hiPSCs-derived organoids shown that hiLOs Mak-f (healthy donor) had a mean area of 1341 px or 5364  $\mu\text{m}^2$  (Q1,Q3: 620–3538 px, n = 103 organoids), while hiLOs P1L5 (from a CF patient) were larger with a mean area of 3982 px or 15928  $\mu\text{m}^2$  (Q1,Q3: 1558–11872 px, n = 428 organoids). These quantitative measurements, performed by semi-automated analysis, demonstrate the ability of the model to detect and characterize significant morphological differences between organoids.

### Application of the model to the forskolin-induced swelling assay

The U-Net model with CellProfiler post-processing was applied to analyze the FIS assay of hiLOs from healthy donor Mak-f and from CF patient (homozygous for F508del in *CFTR*) P1L5 (Fig 4A). The hiLOs P1L5 demonstrated reduced swelling capacity in the FIS assay, the swelling ratio at 24 h compared to baseline (0 h) was significantly greater in healthy organoids (Welch test, p = 0.0006) (Fig 4B). The hiLOs Mak-f showed a swelling ratio of 1.831-fold change (Q1,Q3: 1.238 to 2.34, n = 44 organoids), while the hiLOs P1L5 exhibited a more modest increase of 1.445-fold change (Q1,Q3: 1.323 to 1.563, n = 228 organoids), which confirms functional differences in CFTR-channel activity between healthy and patient-derived hiLOs. The semi-automated analysis effectively quantifies both morphological differences and functional responses, highlighting the model's utility in distinguishing between healthy and disease phenotypes. Thus, we have shown the possibility of FIS analysis without fluorescent dye, using semi-automatic image analysis, which should significantly increase the throughput of the method and make it more convenient and faster in the screening of drugs aimed at the treatment of CF.

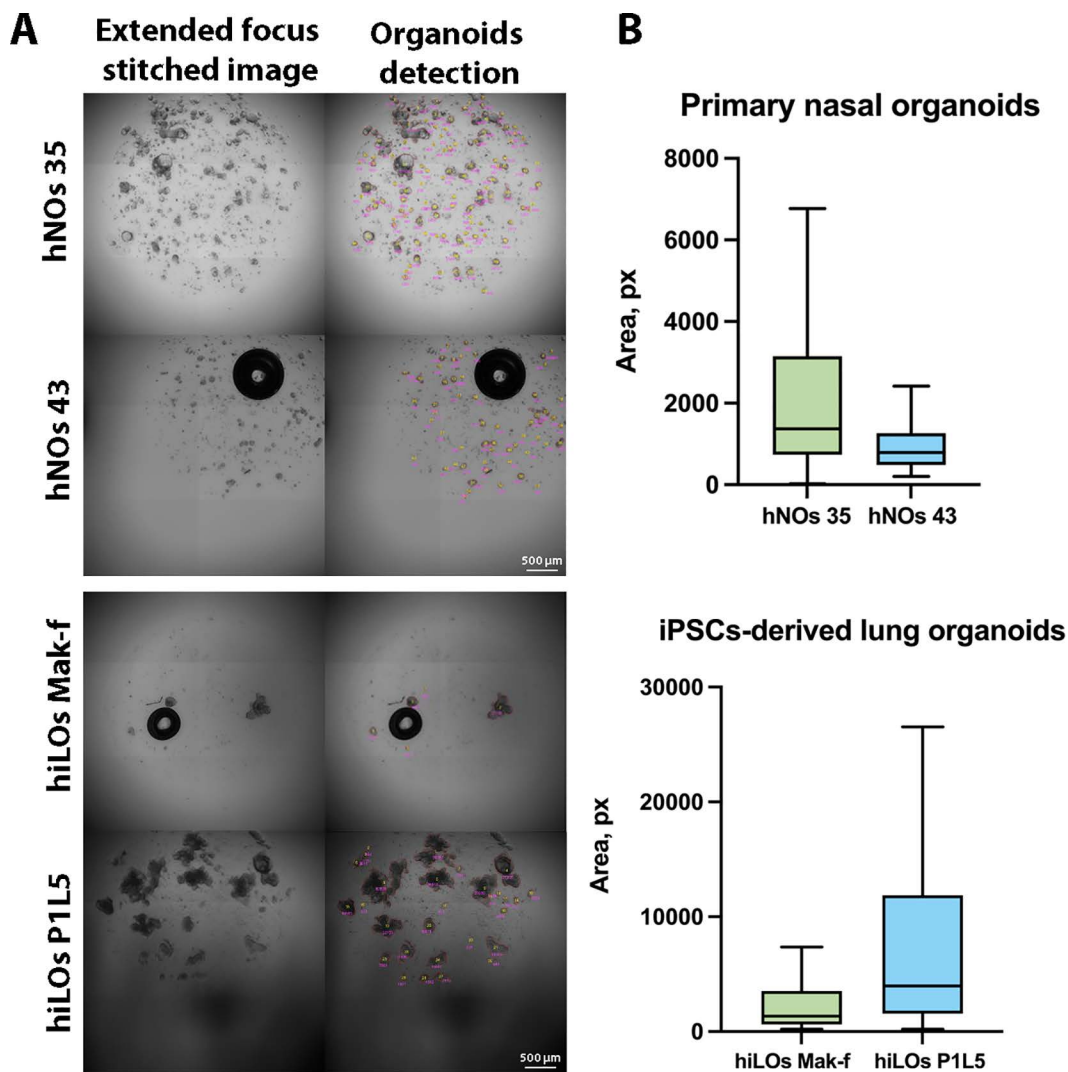

**Fig 3. Performance of the U-Net model with CellProfiler post-processing for detection and area determination of respiratory organoids on new data.** (A) Detection of respiratory organoids of different size, morphology, with the presence of bubbles and irregular illumination. (B) Distribution of individual organoid areas showing distinct size profiles. Data are presented as median (Q1,Q3).

<https://doi.org/10.1371/journal.pcbi.1013589.g003>

## Discussion

In this study, we present a deep learning algorithm that is capable of automatically generating high-resolution extended focus stitched images and analyzing organoid images in the bright-field based on the U-Net model. The availability of an automated or semi-automated program facilitates the evaluation of large image data, a process that is essential for high-throughput organoid screening, where manual analysis is not possible. Respiratory organoids have been extensively used for respiratory disease modeling [47–49] and drug testing [19,50,51]. However, the development of algorithms that are trained on images of primary and induced respiratory organoids for automated analysis has not been previously published. As organoids are three-dimensional objects which reside in the thickness of the extracellular matrix (e.g., Matrigel), it is not possible to detect all organoids in focus. Therefore, it is reasonable to apply z-stack technology when imaging organoids in order to capture all organoids. It was found that only one program was capable of this function [32]. Compared to

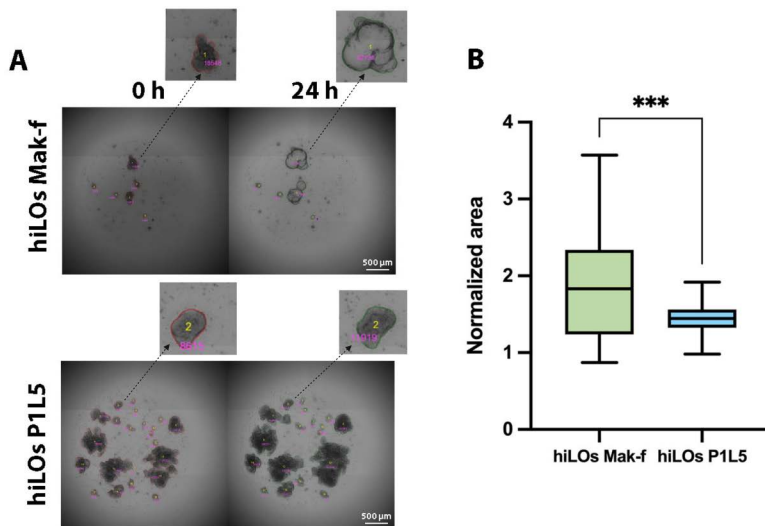

**Fig 4. FIS image analysis using the semi-automatic algorithm.** (A) Representative EFSI of hiLOs with organoid detection, taken before and after 24 h of stimulation with 10  $\mu$ M forskolin. Organoid identifiers (IDs) are annotated in yellow, while corresponding area measurements (in pixels) are indicated in pink. (B) Quantification of the hiLOs swelling area at 24 h, normalized to the value at 0 h. Data are presented as a box-and-whisker plot by Tukey methods, \*\*\* -  $p < 0.001$ .

<https://doi.org/10.1371/journal.pcbi.1013589.g004>

most existing algorithms, our algorithm is designed to work with images from high-throughput analysis, where images are acquired automatically from the entire well and with 10 levels of focus (1000  $\mu$ m thickness in 100  $\mu$ m steps) without loss of information and manual FOV selection. The employment of semantic segmentation within the algorithm, as compared to the use of bounding boxes, enables the analysis of organoid morphology, which is a pivotal aspect in the evaluation of swelling in FIS and DIS tests, as well as the assessment of organoids viability. We showed that our algorithm is able to accurately (IoU=0.8856, Accuracy=0.9953, F1=0.937) detect hiLOs and NOs of different shapes (large, small, round, spherical and branching). An IoU greater than 0.5 is generally considered to reflect a good prediction [52,53]. It should be noted that while the accuracy of 0.9953 appears exceptionally high in our study, this metric is profoundly misleading due to the extreme class imbalance between “background” and “organoids” inherent in our image data. Therefore, accuracy is not a relevant performance metric for our task, and we primarily rely on the IoU and F1-score, which are specifically designed to be robust to such class imbalance. Our obtained values are not inferior, but even superior to the accuracy of such algorithms as Organoid (IoU=0.74) and OrgaExtractor (Accuracy=81.3%) [35,41]. However, direct cross-study performance comparison is limited by domain shift—models trained under different imaging conditions (resolution, illumination, microscopy systems) and on different organoid types typically generalize poorly without fine-tuning. As expected, the proposed U-Net-based segmentation model achieves higher accuracy than the CellProfiler and the standard ilastik pixel classifier, because CNNs learn multi-scale, context-aware representations that capture spatial structure and object boundaries rather than classifying pixels independently. A limitation of the present algorithm is that it was evaluated using data from a single microscope type, which may limit its applicability to other laboratories. The dependence on the Lionheart FX microscope can be addressed by pre-training the model on data from alternative devices. An additional limitation is the specificity of the experimental design, covering both the methodology for obtaining organoids and the specifics of their morphological characteristics during culturing and FIS analysis. Nevertheless, the proposed methodological approach provides researchers with the possibility of adapting and additional training of the model to solve specific problems within their own laboratory conditions.

We evaluated the hiLOs response in a FIS assay without fluorescent dye using the developed algorithm for the first time. The automation and simplification of the FIS and DIS assay has the potential to accelerate the process of CFTR

modulator screening for patients with rare mutations. Previously, the protocol for performing FIS assay always included the use of calcein green [54,55]. However, as has been repeatedly discussed, the use of fluorescent dyes can be associated with cytotoxic effects on cells [56] and also diffuse unevenly through the extracellular matrix. In case of prolonged FIS assay (12–24 h), which is typical for respiratory organoids, the dye is washed out and it is necessary to reapply the dye, a process that extends the experiment and has the potential to displace the droplets of extracellular matrix in the well due to additional mechanical manipulations.

The availability of open-source datasets is necessary for training and testing of algorithms, and no such datasets were previously available for NOs and LOs. We provide an open-source respiratory organoids dataset including 827 organoid images, which will be useful for the development of high-throughput screening of respiratory diseases. The algorithm has been tested on only two types of organoids, but due to the fact that the training sample and the analysis are as diverse in morphology as possible, the algorithm can be adapted to analyze alveolar, bronchial, and other types of organoids.

To summarize, we described an algorithm for data acquisition and image analysis of respiratory organoids using convolutional neural networks U-Net. This algorithm is capable of detecting organoids with a high degree of accuracy for subsequent analysis of the obtained data on organoid morphometry. The study demonstrates the application of the algorithm in FIS assay, which allows to optimize the process of both the analysis itself (due to the work of the algorithm with BF images and the absence of fluorescent dye) and the processing of the obtained images to increase the throughput of the analysis. Semi-automated pipeline shows significant potential for clinical integration, particularly in personalized medicine platforms for CF. By enabling high-throughput, dye-free functional analysis of patient-derived organoids, this approach could accelerate the selection of effective CFTR modulator combinations for individuals with rare mutations, ultimately supporting treatment personalization.

## Materials and methods

### Ethics statement

The study was approved by the Ethics Committee of the Research Centre for Medical Genetics (Moscow, Russia) and conducted in accordance with the provisions of the Declaration of Helsinki of 1975. Patients and healthy donors signed informed written consent forms as anonymous participants in the study and donors of biological materials.

### Cell and organoids cultures

Human NOs (hNOs) were generated from human nasal epithelial cells (hNECs) derived from two donors (Table 2). To obtain hNECs, brush biopsies of nasal epithelium were placed in a sterile tube containing a transport medium consisting of DMEM (PanEco, Russia), 10 µg/mL of fungin (InvivoGen, France), 100 u/mL of penicillin and 100 µg/mL of streptomycin (PanEco, Russia). The resulting biomaterial was centrifuged for 5 min at 150 × g and cultured on culture plates coated with Matrigel (Corning, USA) in basal cell media (BCM) consisting of PneumaCult-Ex Plus Medium (STEMCELL Technologies, Canada) with 1 µM A83-01 (STEMCELL Technologies, Canada), 1 µM DMH1 (Sigma Aldrich, USA), 0.2 µM Hydrocortisone (STEMCELL Technologies, Canada), and 100 × penicillin-streptomycin (PanEco, Russia). For generation of hNOs, hNECs were harvested with the 0.25% Trypsin-EDTA solution (PanEco, Russia), counted using a Countess II FL Automated Cell Counter (Thermo Fisher Scientific, USA), and centrifuged at 150 × g for 5 min. The pellet was resuspended in undiluted cold Matrigel at a concentration of 1,000 cells/µL and replated in 10 µL drops into the wells of a 48-well plate (Corning, USA). The drops were allowed to solidify for 40 min in an incubator, after which the medium for nasal organoids were added. On day 7 after hNOs assembly, organoids were passage into a 96-well plate with a 3 µL drop volume in nasal organoid medium. Medium for nasal organoids consist of Serum-free differentiation medium (SFDM) with 250 ng/mL FGF2 (R&D Systems, USA), 100 ng/mL FGF10 (R&D Systems, USA), 50 nM dexamethasone (Sigma Aldrich, USA), 0.1 mM 8-bromo-cAMP (Sigma Aldrich, USA) and 0.1 mM 3-isobutyl-1-methylxanthine (Sigma Aldrich, USA). SFDM consist of 75% IMDM (Thermo Fisher Scientific, USA), 25% Ham's F12 (PanEco, Russia), 100 × B-27 (Thermo Fisher Scientific,

USA), 200 × N2 (PanEco, Russia), 0.05% bovine serum albumin solution (Sigma Aldrich, USA), 0.45 mM 1-thioglycerol (Sigma Aldrich, USA), 100 × GlutaMAX (Thermo Fisher Scientific, USA), 0.05 mg/mL L-ascorbic acid (Sigma Aldrich, USA) and 100 × penicillin-streptomycin. Characterization of hNECs and hNOs is presented in Fig A Text.

hiLOs were generated from induced basal cells (hiBCs) derived from hiPSCs using a protocol described previously [57]. Three hiBC lines of 3–5 passages obtained from three cystic fibrosis patients with homozygous F508del mutation in *CFTR* gene and one hiBC line from healthy donor were used (Table 2). hiBCs were cultured on culture plates coated with Matrigel in BCM medium. hiLOs derived from hiBCs were cultured into growth-factor reduced Matrigel and the medium for the hiLOs (lung medium) consisted of SFDM with 10 ng/mL FGF7 (R&D Systems, USA), 10 ng/mL FGF10, 10 ng/mL EGF (R&D Systems, USA) and 3 μM CHIR99021 (Tocris, UK). FIS assay was performed on day 7 after hiLOs assembly.

### Dataset creation and model training

To compile the dataset, we acquired images of 6 FOV from wells of a 96-well plate at different focal plane levels. Images were captured using a Lionheart FX automated imager (BioTek, USA) at 4 × magnification in the BF channel, with 2 images along the x-axis and 3 images along the y-axis. Each FOV contained 10 focus levels with 100 μm increments. The images were 1224 × 904 pixels (px) and saved in 16-bit.tif format. We processed the images using our developed Focus-Pocus algorithm, which generates EFSI through a simple z-stack focus algorithm followed by xy stitching. Subsequently, the edges were cropped to form a square, resulting in a single high-resolution EFSI with a pixel size of 2.0 μm/px and dimensions of 2100 × 2100 px. Ground truth masks were generated by two independent annotators blinded to model outputs using polygon tools in LabelMe software version 5.1.1 in strict accordance with written annotation guidelines, which required tracing the outer visible contour of each organoid, excluding apoptotic and dead organoids, vesicles, debris/particles, and single cells or small clusters under a minimum area threshold of 300 px<sup>2</sup>, while also specifying that touching objects should not be separated and were to be annotated as a single instance. A total of 827 annotated organoid images and their binary masks were obtained. Inter-annotator agreement was computed per image (F1, IoU). The reference ground truth was obtained via pixel-wise Intersection (AND) of the two masks (unanimous consensus). The images were then downsampled to 512 × 512 px (downsample factor 4.1). The training images and their masks were saved in.png format.

To train a U-Net model for segmentation of BF organoid images, a sample of 827 manually labelled organoid images from two respiratory organoid cultures (4 hiLO lines and 2 hNO lines) was compiled. The total dataset was stratified into three subsamples: 703 images for training (85%), 83 validation (10%) and 41 tests (post-training model accuracy assessment, 5%). Before training, images were normalized by 1–99 percentile and contrast was improved by CLAHE (Contrast Limited Adaptive Histogram Equalization) with parameters clip limit = 1, tile size = 32. Training was performed in DeepMIB version 2.91 beta20 (University of Helsinki, Finland). Segmentation was performed using a CNN of U-Net architecture with 5 depth levels, filter size 3 and 32 filters. Activation layer was ReLu, segmentation layer is dice pixel classification. For training, 100% of the training dataset was augmented with reflection, rotation, shear, scale, blur, noise, brightness and contrast jitter. Solver was stochastic gradient descent with momentum with learning rate 0.01 and learning rate drop factor 0.5 every 75 epoch. Mini batch size was 16 images. The training lasted for 1000 epochs. The resulting model was evaluated using IoU, F1-Score and Accuracy metrics. The standard ilastik pixel classifier was selected for benchmarking and was trained on the identical dataset, such as the U-Net model. No data augmentation was performed, training on a standard set of features. All model training and inference were performed on a laptop equipped with an AMD Ryzen 7 7735HS CPU, 16 GB DDR5 RAM, and an NVIDIA GeForce RTX 4060 Laptop GPU, with a total training time of approximately 20 h. The full dataset, which allows reproduce the results of research, including the images and annotations, are publicly available at [https://osf.io/4savy/?view\\_only=2163a86b20a5468989c041536752b19e](https://osf.io/4savy/?view_only=2163a86b20a5468989c041536752b19e) under an MIT license.

## FIS assay and images accuration

To perform the FIS assay, hiLOs were passage into a 96-well plate with a 3  $\mu$ l drop volume in lung organoid medium. On the first day of analysis, forskolin at a final concentration of 10  $\mu$ M was added to the wells containing the organoids, then images were acquired on a Lionheart FX automated imager in the BF channel with a 4  $\times$  magnification as described in the section above. Then, after incubation for 24 h, images were acquired on a Lionheart FX Automated Microscope again.

## Statistical analysis

The statistical analysis and representation of the data were conducted using GraphPad Prism v.9.1.1. Descriptive statistics were calculated as the mean values with standard deviations (SD) as well as median values with interquartile ranges (Q1-Q3). For comparison of organoid sizes between groups, both parametric (Welch's t-test) and non-parametric (Mann-Whitney U test) methods were applied depending on data distribution characteristics. In order to analyze the normalized swelling areas of hiLOs over time, a subset of hiLOs with area  $\geq 1500$  px and  $\geq 0.8$ -fold change was selected, with 0 h of incubation set as a 1-fold increase. Statistical analysis was performed using a one-way analysis of variance (ANOVA) with post hoc Sidak tests. Correlation between parameters was assessed using Pearson's correlation coefficient. The data were considered statistically significant at a p-value of less than 0.05.

## Supporting information

**S1 Text. Table A.** Model performance metrics. Fig A. Characterisation of hNECs and hNOs (donor 4). A - Representative phase-contrast images of of hNECs on 1st passage and hNOs at 7 days of generation from hNECs. Scale bar, 200  $\mu$ m. B - Representative images from fluorescent microscopy of hNECs stained against major basal epithelial cells markers. Scale bar, 100  $\mu$ m. C - Representative images from confocal microscopy of hNOs stained KRT5 (cytoplasmic localization), TP63(nuclear localization), Muc5AC (intracellular localization) and SCGB3A2 (cytoplasmic localization) at 7 days of differentiation from hNECs. Nuclei were stained with DAPI (blue). Scale bar, 50  $\mu$ m. Fig B. Binary masks predicted by the ilastik with color-coding: green – true positive, red - false positives, blue - false negative. (DOCX)

## Author contributions

**Conceptualization:** Anna Demchenko.

**Data curation:** Anna Demchenko, Tatiana Kyian, Marina Loguinova.

**Formal analysis:** Maxim Balyasin.

**Investigation:** Anna Demchenko, Alyona Sorokina.

**Methodology:** Anna Demchenko, Maxim Balyasin, Elena Kondratyeva, Tatiana Kyian, Alyona Sorokina.

**Project administration:** Svetlana Smirnikhina.

**Software:** Maxim Balyasin.

**Supervision:** Elena Kondratyeva, Marina Loguinova, Svetlana Smirnikhina.

**Writing – original draft:** Anna Demchenko, Maxim Balyasin.

**Writing – review & editing:** Svetlana Smirnikhina.

## References

1. Yao Q, Cheng S, Pan Q, Yu J, Cao G, Li L, et al. Organoids: development and applications in disease models, drug discovery, precision medicine, and regenerative medicine. *MedComm* (2020). 2024;5(10):e735. <https://doi.org/10.1002/mco2.735> PMID: 39309690

2. Gopallawa I, Lee H, Uhl FE. Applications of organoids in advancing drug discovery and development. *J Pharm Sci.* 2024.
3. Tang X-Y, Wu S, Wang D, Chu C, Hong Y, Tao M, et al. Human organoids in basic research and clinical applications. *Signal Transduct Target Ther.* 2022;7(1):168. <https://doi.org/10.1038/s41392-022-01024-9> PMID: 35610212
4. Strikoudis A, Cieślak A, Loffredo L, Chen Y-W, Patel N, Saqi A, et al. Modeling of fibrotic lung disease using 3D organoids derived from human pluripotent stem cells. *Cell Rep.* 2019;27(12):3709-3723.e5. <https://doi.org/10.1016/j.celrep.2019.05.077> PMID: 31216486
5. Yang W, Li Y, Shi F, Liu H. Human lung organoid: models for respiratory biology and diseases. *Dev Biol.* 2023;494:26–34. <https://doi.org/10.1016/j.ydbio.2022.12.001> PMID: 36470449
6. Chen J, Na F. Organoid technology and applications in lung diseases: Models, mechanism research and therapy opportunities. *Front Bioeng Biotechnol.* 2022;10:1066869. <https://doi.org/10.3389/fbioe.2022.1066869> PMID: 36568297
7. Chiu MC, Li C, Liu X, Song W, Wan Z, Yu Y, et al. Human nasal organoids model SARS-CoV-2 upper respiratory infection and recapitulate the differential infectivity of emerging variants. *mBio.* 2022;13(4):e0194422. <https://doi.org/10.1128/mbio.01944-22> PMID: 35938726
8. Salgueiro L, Kummer S, Sonntag-Buck V, Weiß A, Schneider MA, Kräusslich H-G, et al. Generation of human lung organoid cultures from healthy and tumor tissue to study infectious diseases. *J Virol.* 2022;96(7):e0009822. <https://doi.org/10.1128/jvi.00098-22> PMID: 35285684
9. Ramezanpour M, Bolt H, Hon K, Shaghayegh G, Rastin H, Fenix KA, et al. Characterization of human nasal organoids from chronic rhinosinusitis patients. *Biol Open.* 2022;11(8):bio059267. <https://doi.org/10.1242/bio.059267> PMID: 35452072
10. Miller AJ, Dye BR, Ferrer-Torres D, Hill DR, Overeem AW, Shea LD, et al. Generation of lung organoids from human pluripotent stem cells in vitro. *Nat Protoc.* 2019;14(2):518–40. <https://doi.org/10.1038/s41596-018-0104-8> PMID: 30664680
11. Demchenko A, Kondrateva E, Tabakov V, Efremova A, Salikhova D, Bukharova T, et al. Airway and lung organoids from human-induced pluripotent stem cells can be used to assess CFTR conductance. *Int J Mol Sci.* 2023;24(7):6293. <https://doi.org/10.3390/ijms24076293> PMID: 37047264
12. Turhan AG, Hwang JW, Chaker D, Tasteyre A, Latsis T, Griscelli F, et al. iPSC-derived organoids as therapeutic models in regenerative medicine and oncology. *Front Med (Lausanne).* 2021;8:728543. <https://doi.org/10.3389/fmed.2021.728543> PMID: 34722569
13. Thangam T, Parthasarathy K, Supraja K, Haribalaji V, Sounderrajan V, Rao SS, et al. Lung organoids: systematic review of recent advancements and its future perspectives. *Tissue Eng Regen Med.* 2024;21(5):653–71. <https://doi.org/10.1007/s13770-024-00628-2> PMID: 38466362
14. Voronkova AY, Amelina EL, Kashirskaya NY. Register of patients with cystic fibrosis in the Russian Federation. *MEDPRACTICA-M.* 2024;68.
15. Cystic Fibrosis Foundation. Patient registry; 2024. Available from: <https://www.cff.org/medical-professionals/patient-registry>
16. The European Cystic Fibrosis Society. The European Cystic Fibrosis society patient registry. Highlights Report 2023. 2025.
17. Bosch B, De Boeck K. Searching for a cure for cystic fibrosis. A 25-year quest in a nutshell. *Eur J Pediatr.* 2016;175(1):1–8. <https://doi.org/10.1007/s00431-015-2664-8> PMID: 26567541
18. Dekkers JF, Wiegerinck CL, de Jonge HR, Bronsveld I, Janssens HM, de Winter-de Groot KM, et al. A functional CFTR assay using primary cystic fibrosis intestinal organoids. *Nat Med.* 2013;19(7):939–45. <https://doi.org/10.1038/nm.3201> PMID: 23727931
19. Anderson JD, Liu Z, Odom LV, Kersh L, Guimbellot JS. CFTR function and clinical response to modulators parallel nasal epithelial organoid swelling. *Am J Physiol Lung Cell Mol Physiol.* 2021;321(1):L119–29. <https://doi.org/10.1152/ajplung.00639.2020> PMID: 34009038
20. Hagemeyer MC, Vonk AM, Awatade NT, Silva IAL, Tischer C, Hilsenstein V, et al. An open-source high-content analysis workflow for CFTR function measurements using the forskolin-induced swelling assay. *Bioinformatics.* 2021;36(24):5686–94. <https://doi.org/10.1093/bioinformatics/btaa1073> PMID: 33367496
21. Demchenko A, Balyasin M, Nazarova A, Grigorieva O, Panchuk I, Kondrateva E, et al. Human induced lung organoids: a promising tool for cystic fibrosis drug screening. *Int J Mol Sci.* 2025;26(2):437. <https://doi.org/10.3390/ijms26020437> PMID: 39859153
22. Zhao X, Wu Y, Song G. A review of convolutional neural networks in computer vision. *Artif Intell Rev.* 2024;57(4):99.
23. Cicceri G, Di Bella S, Di Franco S, Stassi G, Todaro M, Vitabile S. Deep learning approaches for morphological classification of intestinal organoids. *IEEE Access.* 2025;13:62267–87. <https://doi.org/10.1109/access.2025.3558621>
24. Schmidt U, Weigert M, Broaddus C. Cell detection with star-convex polygons. *Med Image Comput Comput Assist Interv.* 2018;11071:265–73.
25. Neha F, Sharma M, Singh VP. U-net in medical image segmentation: a review of its applications across modalities. *arXiv.* 2024:2412.02242.
26. Stringer C, Wang T, Michaelos M, Pachitariu M. Cellpose: a generalist algorithm for cellular segmentation. *Nat Methods.* 2021;18(1):100–6. <https://doi.org/10.1038/s41592-020-01018-x> PMID: 33318659
27. Belevich I, Jokitalo E. DeepMIB: user-friendly and open-source software for training of deep learning network for biological image segmentation. *PLoS Comput Biol.* 2021;17(3):e1008374. <https://doi.org/10.1371/journal.pcbi.1008374> PMID: 33651804
28. Pal A, Rai HM, Frej MBH, Razaque A. Advanced segmentation of gastrointestinal (GI) cancer disease using a novel U-MaskNet model. *Life (Basel).* 2024;14(11):1488. <https://doi.org/10.3390/life14111488> PMID: 39598286
29. Widyaningrum R, Candradewi I, Aji NRAS, Aulianisa R. Comparison of Multi-Label U-Net and Mask R-CNN for panoramic radiograph segmentation to detect periodontitis. *Imaging Sci Dent.* 2022;52(4):383–91. <https://doi.org/10.5624/isd.20220105> PMID: 36605859
30. Wadan A-HS. Organoid intelligence and biocomputing advances: Current steps and future directions. *BOSNJ.* 2025;3:8–14. <https://doi.org/10.1016/j.bosn.2025.01.002>

31. Abdul L, Rajasekar S, Lin DSY, Venkatasubramania Raja S, Sotra A, Feng Y, et al. Deep-LUMEN assay - human lung epithelial spheroid classification from brightfield images using deep learning. *Lab Chip*. 2020;20(24):4623–31. <https://doi.org/10.1039/d0lc01010c> PMID: [33151236](https://pubmed.ncbi.nlm.nih.gov/33151236/)
32. Bian X, Li G, Wang C, Liu W, Lin X, Chen Z, et al. A deep learning model for detection and tracking in high-throughput images of organoid. *Comput Biol Med*. 2021;134:104490. <https://doi.org/10.1016/j.compbiomed.2021.104490> PMID: [34102401](https://pubmed.ncbi.nlm.nih.gov/34102401/)
33. Abdul L, Xu J, Sotra A, Chaudary A, Gao J, Rajasekar S, et al. D-CryptO: deep learning-based analysis of colon organoid morphology from brightfield images. *Lab Chip*. 2022;22(21):4118–28. <https://doi.org/10.1039/d2lc00596d> PMID: [36200406](https://pubmed.ncbi.nlm.nih.gov/36200406/)
34. Bulcaen M, Liu RB, Gryspeert K, Thierie S, Ramalho AS, Vermeulen F, et al. Protocol for functional screening of CFTR-targeted genetic therapies in patient-derived organoids using DETECTOR deep-learning-based analysis. *STAR Protoc*. 2025;6(1):103593. <https://doi.org/10.1016/j.xpro.2024.103593> PMID: [39893642](https://pubmed.ncbi.nlm.nih.gov/39893642/)
35. Matthews JM, Schuster B, Kashaf SS, Liu P, Ben-Yishay R, Ishay-Ronen D, et al. Organoid: a versatile deep learning platform for tracking and analysis of single-organoid dynamics. *PLoS Comput Biol*. 2022;18(11):e1010584. <https://doi.org/10.1371/journal.pcbi.1010584> PMID: [36350878](https://pubmed.ncbi.nlm.nih.gov/36350878/)
36. Kassis T, Hernandez-Gordillo V, Langer R, Griffith LG. OrgaQuant: human intestinal organoid localization and quantification using deep convolutional neural networks. *Sci Rep*. 2019;9(1):12479. <https://doi.org/10.1038/s41598-019-48874-y> PMID: [31462669](https://pubmed.ncbi.nlm.nih.gov/31462669/)
37. Borten MA, Bajikar SS, Sasaki N. Automated brightfield morphometry of 3D organoid populations by OrganoSeg. *Sci Rep*. 2018;8(1):5319. <https://doi.org/10.1038/s41598-018-21712-0>
38. Lefferts JW, Kroes S, Smith MB, Niemöller PJ, Nieuwenhuijze NDA, Sonneveld van Kooten HN, et al. OrgaSegment: deep-learning based organoid segmentation to quantify CFTR dependent fluid secretion. *Commun Biol*. 2024;7(1):319. <https://doi.org/10.1038/s42003-024-05966-4> PMID: [38480810](https://pubmed.ncbi.nlm.nih.gov/38480810/)
39. Kulkarni A, Ferreira N, Scodellaro R, Choezom D, Alves F. A curated cell life imaging dataset of immune-enriched pancreatic cancer organoids with pre-trained AI models. *Sci Data*. 2024;11(1):820. <https://doi.org/10.1038/s41597-024-03631-3> PMID: [39048591](https://pubmed.ncbi.nlm.nih.gov/39048591/)
40. Ferreira N, Kulkarni A, Agorku D, Midelashvili T, Hardt O, Legler TJ, et al. OrganoidNet: a deep learning tool for identification of therapeutic effects in PDAC organoid-PBMC co-cultures from time-resolved imaging data. *Cell Oncol (Dordr)*. 2025;48(1):101–22. <https://doi.org/10.1007/s13402-024-00958-2> PMID: [38805131](https://pubmed.ncbi.nlm.nih.gov/38805131/)
41. Kahveci B, Polatli E, Bastanlar Y, Guven S. OrganoLabeler: a quick and accurate annotation tool for organoid images. *ACS Omega*. 2024;9(46):46117–28. <https://doi.org/10.1021/acsomega.4c06450> PMID: [39583683](https://pubmed.ncbi.nlm.nih.gov/39583683/)
42. Park T, Kim TK, Han YD, Kim K-A, Kim H, Kim HS. Development of a deep learning based image processing tool for enhanced organoid analysis. *Sci Rep*. 2023;13(1):19841. <https://doi.org/10.1038/s41598-023-46485-2> PMID: [37963925](https://pubmed.ncbi.nlm.nih.gov/37963925/)
43. Leng B, Jiang H, Wang B, Wang J, Luo G. Deep-Orga: An improved deep learning-based lightweight model for intestinal organoid detection. *Comput Biol Med*. 2024;169:107847. <https://doi.org/10.1016/j.compbiomed.2023.107847> PMID: [38141452](https://pubmed.ncbi.nlm.nih.gov/38141452/)
44. Deben C, De La Hoz EC, Compte ML, Van Schil P, Hendriks JMH, Lauwers P, et al. OrBITS: label-free and time-lapse monitoring of patient derived organoids for advanced drug screening. *Cell Oncol (Dordr)*. 2023;46(2):299–314. <https://doi.org/10.1007/s13402-022-00750-0> PMID: [36508089](https://pubmed.ncbi.nlm.nih.gov/36508089/)
45. Carpenter AE, Jones TR, Lamprecht MR, Clarke C, Kang IH, Friman O, et al. CellProfiler: image analysis software for identifying and quantifying cell phenotypes. *Genome Biol*. 2006;7(10):R100. <https://doi.org/10.1186/gb-2006-7-10-r100> PMID: [17076895](https://pubmed.ncbi.nlm.nih.gov/17076895/)
46. Dekkers JF, Berkers G, Kruisselbrink E, Vonk A, de Jonge HR, Janssens HM, et al. Characterizing responses to CFTR-modulating drugs using rectal organoids derived from subjects with cystic fibrosis. *Sci Transl Med*. 2016;8(344):344ra84. <https://doi.org/10.1126/scitranslmed.aad8278> PMID: [27334259](https://pubmed.ncbi.nlm.nih.gov/27334259/)
47. Han Y, Yang L, Lacko LA, Chen S. Human organoid models to study SARS-CoV-2 infection. *Nat Methods*. 2022;19(4):418–28. <https://doi.org/10.1038/s41592-022-01453-y> PMID: [35396481](https://pubmed.ncbi.nlm.nih.gov/35396481/)
48. Matkovic Leko I, Schneider RT, Thimraj TA, Schrode N, Beitler D, Liu H-Y, et al. A distal lung organoid model to study interstitial lung disease, viral infection and human lung development. *Nat Protoc*. 2023;18(7):2283–312. <https://doi.org/10.1038/s41596-023-00827-6> PMID: [37165073](https://pubmed.ncbi.nlm.nih.gov/37165073/)
49. Huo Y, He S, Chen Y. Lung organoids in COPD: recent advances and future prospects. *Respir Res*. 2025;26(1):76. <https://doi.org/10.1186/s12931-025-03138-4> PMID: [40022099](https://pubmed.ncbi.nlm.nih.gov/40022099/)
50. Taverna JA, Hung C-N, Williams M, Williams R, Chen M, Kamali S, et al. Ex vivo drug testing of patient-derived lung organoids to predict treatment responses for personalized medicine. *Lung Cancer*. 2024;190:107533. <https://doi.org/10.1016/j.lungcan.2024.107533> PMID: [38520909](https://pubmed.ncbi.nlm.nih.gov/38520909/)
51. Wang H, Han Z, Yang Y, Liu L, Huang Y, Chen J, et al. Modeling of lung organoid-based fibrosis for testing the sensitivity of anti-fibrotic drugs. *Stem Cell Res Ther*. 2025;16(1):132. <https://doi.org/10.1186/s13287-025-04251-3> PMID: [40069846](https://pubmed.ncbi.nlm.nih.gov/40069846/)
52. Engbrecht F, Ruider IE, Bausch AR. Automatic image annotation for fluorescent cell nuclei segmentation. *PLoS One*. 2021;16(4):e0250093. <https://doi.org/10.1371/journal.pone.0250093> PMID: [33861785](https://pubmed.ncbi.nlm.nih.gov/33861785/)
53. Long F. Microscopy cell nuclei segmentation with enhanced U-Net. *BMC Bioinformatics*. 2020;21(1):8. <https://doi.org/10.1186/s12859-019-3332-1> PMID: [31914944](https://pubmed.ncbi.nlm.nih.gov/31914944/)
54. Vonk AM, van Mourik P, Ramalho AS, Silva IAL, Statia M, Kruisselbrink E, et al. Protocol for application, standardization and validation of the forskolin-induced swelling assay in cystic fibrosis human colon organoids. *STAR Protoc*. 2020;1(1):100019. <https://doi.org/10.1016/j.xpro.2020.100019> PMID: [33111074](https://pubmed.ncbi.nlm.nih.gov/33111074/)

55. Amatngalim GD, Rodenburg LW, Aalbers BL, Raeven HH, Aarts EM, Sarhane D, et al. Measuring cystic fibrosis drug responses in organoids derived from 2D differentiated nasal epithelia. *Life Sci Alliance*. 2022;5(12):e202101320. <https://doi.org/10.26508/lsa.202101320> PMID: [35922154](https://pubmed.ncbi.nlm.nih.gov/35922154/)
56. Icha J, Weber M, Waters JC, Norden C. Phototoxicity in live fluorescence microscopy, and how to avoid it. *Bioessays*. 2017;39(8):10.1002/bies.201700003. <https://doi.org/10.1002/bies.201700003> PMID: [28749075](https://pubmed.ncbi.nlm.nih.gov/28749075/)
57. Demchenko A, Belova L, Balyasin M, Kochergin-Nikitsky K, Kondrateva E, Voronina E, et al. Airway basal cells from human-induced pluripotent stem cells: a new frontier in cystic fibrosis research. *Front Cell Dev Biol*. 2024;12:1336392. <https://doi.org/10.3389/fcell.2024.1336392> PMID: [38737127](https://pubmed.ncbi.nlm.nih.gov/38737127/)
58. Kondrateva E, Adilgereeva E, Amelina E, Tabakov V, Demchenko A, Ustinov K, et al. Generation of induced pluripotent stem cell line (RCMGi001-A) from human skin fibroblasts of a cystic fibrosis patient with p.F508del mutation. *Stem Cell Res*. 2020;48:101933. <https://doi.org/10.1016/j.scr.2020.101933> PMID: [32777768](https://pubmed.ncbi.nlm.nih.gov/32777768/)
59. Panchuk I, Kondrateva E, Demchenko A, Grigorieva O, Erofeeva A, Amelina E, et al. Generation of two induced pluripotent stem cell lines (RCMGi005-A/B) from human skin fibroblasts of a cystic fibrosis patient with homozygous F508del mutation in CFTR gene. *Stem Cell Res*. 2022;64:102896. <https://doi.org/10.1016/j.scr.2022.102896> PMID: [36067639](https://pubmed.ncbi.nlm.nih.gov/36067639/)
60. Kondrateva E, Demchenko A, Slesarenko Y, Yasinovsky M, Amelina E, Tabakov V, et al. Derivation of iPSC line (RCMGi002-A) from dermal fibroblasts of a cystic fibrosis female patient with homozygous F508del mutation. *Stem Cell Res*. 2021;53:102251. <https://doi.org/10.1016/j.scr.2021.102251> PMID: [33684631](https://pubmed.ncbi.nlm.nih.gov/33684631/)
61. Salikhova DI, Leonov GE, Bukharova TB, Kornienko ZV, Bulatenko NV, Efremova AS, et al. Comparative impact analysis of neuronal and glial progenitors conditioned medium on cerebellar neurons under glutamate excitotoxicity. *Genes Cells*. 2019;14(4):46–53. <https://doi.org/10.23868/201912031>
